# Supplementary material
Source: HighWire-hosted journal article supplement (https://cmaj.ca/highwire/filestream/60033/field_highwire_adjunct_files/0/160126-res-1-at.pdf)
Supplement: 160126-res-1-at.pdf [file 160126-res-1-at.pdf]

| <b>Appendix 1 (as supplied by the authors): Definitions of variables included in the propensity score</b> |                             |                                                                                                           |                                                                                                                                                                                                                                                  |
|-----------------------------------------------------------------------------------------------------------|-----------------------------|-----------------------------------------------------------------------------------------------------------|--------------------------------------------------------------------------------------------------------------------------------------------------------------------------------------------------------------------------------------------------|
| <b>Variable</b>                                                                                           | <b>Data source</b>          | <b>Measurement point</b>                                                                                  | <b>Coding</b>                                                                                                                                                                                                                                    |
| Age                                                                                                       | Prescription register       | At the index date                                                                                         | <65, 65-<75, 75-<85, ≥85                                                                                                                                                                                                                         |
| Gender                                                                                                    | Prescription register       | At the index date                                                                                         |                                                                                                                                                                                                                                                  |
| Occupational socioeconomic position                                                                       | Statistics Finland          | Highest position recorded in population census at middle age, i.e. when persons were aged 45-55 years old | High (entrepreneurs and higher clerical workers), medium (lower clerical workers and employees), low (unemployed, retired and students), unknown (unknown position and those with missing data at Statistics Finland)                            |
| Antipsychotic use ever                                                                                    | Prescription register       | Use since 1995 until the index date                                                                       | Antipsychotics N05A excluding lithium N05AN01                                                                                                                                                                                                    |
| Benzodiazepine and related drug use ever                                                                  | Prescription register       | Use since 1995 until the index date                                                                       | Benzodiazepines N05BA, N05CD and/or Z-drugs N05CF                                                                                                                                                                                                |
| Antidepressant use ever                                                                                   | Prescription register       | Use since 1995 until the index date                                                                       | Antidepressants N06A                                                                                                                                                                                                                             |
| Epilepsy                                                                                                  | Reimbursement register      | Diagnosed since 1972 until the index date                                                                 | C71, G40, G41 (special reimbursement code 111)                                                                                                                                                                                                   |
| Cardiovascular disease                                                                                    | Reimbursement register      | Diagnosed since 1972 until the index date                                                                 | Chronic heart failure (I11.0, I13, I50, I97.1, P29.0), coronary artery disease (I20–I22, I24.0, I25), hypertension (I10–I13, I15, I27.0) and/ or cardiac arrhythmia (I47–I49) (special reimbursement codes 201, 206, 205, and 207, respectively) |
| Stroke                                                                                                    | Hospital discharge register | Diagnosed since 1972 until the index date                                                                 | I60-64                                                                                                                                                                                                                                           |
| Asthma/ COPD                                                                                              | Reimbursement register      | Diagnosed since 1972 until the index date                                                                 | E84.0, J41–J45, P27.1, only moderate and severe cases (special reimbursement code 203)                                                                                                                                                           |
| Diabetes                                                                                                  | Reimbursement register      | Diagnosed since 1972 until the index date                                                                 | E10-E14, E89.1 (special reimbursement code 103)                                                                                                                                                                                                  |
| Schizophrenia                                                                                             | Hospital discharge register | Diagnosed since 1972 until 5 years                                                                        | Schizophrenia, schizotypal or delusional disorders F20-29                                                                                                                                                                                        |

Appendix to: Taipale H, Tolppanen A-M, Koponen M, et al. Risk of pneumonia associated with incident benzodiazepine use among community-dwelling adults with Alzheimer disease. *CMAJ* 2017. doi: 10.1503/cmaj.160126. Copyright © 2017 Joule Inc. or its licensors

|                                             |                             |                                                          |                                                                                                                                                                          |
|---------------------------------------------|-----------------------------|----------------------------------------------------------|--------------------------------------------------------------------------------------------------------------------------------------------------------------------------|
|                                             |                             | before the index date                                    |                                                                                                                                                                          |
| Depression or bipolar disorder              | Hospital discharge register | Diagnosed since 1972 until 5 years before the index date | F30-34, F38-39 with corresponding ICD-8 and -9 codes                                                                                                                     |
| Antineoplastic drug use at the index date   | Prescription register       | Use during a 2 week period preceding the index date      | ATC group L (antineoplastic and immunomodulating agents)                                                                                                                 |
| Previous pneumonia                          | Hospital discharge register | Pneumonia during a one year period before AD diagnoses   | J100, J110, J12, J13, J14, J15, J16, J18, J690                                                                                                                           |
| Substance abuse                             | Hospital discharge register | Diagnosed since 1972 until the index date                | Alcohol-induced chronic pancreatitis (K860), mental and behavioral disorders due to psychoactive substance abuse (F10-19) and/or substance abuse as reason for admission |
| Opioid use at the index date                | Prescription register       | Use during a 2 week period preceding the index date      | Opioids N02A                                                                                                                                                             |
| Antipsychotic use at start of follow-up     | Prescription register       | Use during a 2 week period preceding the index date      | Antipsychotics N05A excluding lithium N05AN01                                                                                                                            |
| Antidepressant use at the index date        | Prescription register       | Use during a 2 week period preceding the index date      | Antidepressants N06A                                                                                                                                                     |
| Proton pump inhibitor use at the index date | Prescription register       | Use during a 2 week period preceding the index date      | Proton pump inhibitors A02BC                                                                                                                                             |
| Previous hospital-treated fracture          | Hospital discharge register | Diagnosed since 1972 until the index date                | S*2 or T02* with corresponding ICD-8 and -9 codes                                                                                                                        |
| Chronic heart failure <sup>a)</sup>         | Hospital discharge register | Diagnosed since 1987 until the index date                | ICD-10: I110, I50, I42, I43<br>ICD-9: 40201,40211,40291,4293,425, 428                                                                                                    |
| Any tumor <sup>a)</sup>                     | Hospital discharge register | Diagnosed since 1987 until the index date                | ICD-10: C00-C97 (excluding C43-44), Z85<br>ICD-9: 140-171, 174-195, 2730, 2733, V1046, 200-208                                                                           |
| Cardiac arrhythmia <sup>a)</sup>            | Hospital discharge          | Diagnosed since 1987                                     | ICD-10: Z95 Z45, I44-I46<br>ICD-9:42610, 42611, 42613, 4262-4264, 42650-                                                                                                 |

Appendix to: Taipale H, Tolppanen A-M, Koponen M, et al. Risk of pneumonia associated with incident benzodiazepine use among community-dwelling adults with Alzheimer disease. *CMAJ* 2017. doi: 10.1503/cmaj.160126. Copyright © 2017 Joule Inc. or its licensors

|                                               |                             |                                                                                     |                                                                                                                                                      |
|-----------------------------------------------|-----------------------------|-------------------------------------------------------------------------------------|------------------------------------------------------------------------------------------------------------------------------------------------------|
|                                               | register                    | until the index date                                                                | 42653,4266-4268,4270, 4272, 42731, 42760, 4279, 7850, V450, V533                                                                                     |
| Any pulmonary disease <sup>a)</sup>           | Hospital discharge register | Diagnosed since 1987 until the index date                                           | ICD-10: I26, I272, I278, I279, J41, J42, J44, J439, J45, J47<br>ICD-9:4150, 4168, 4169, 491, 492, 493, 494, 496                                      |
| Complicated diabetes <sup>a)</sup>            | Hospital discharge register | Diagnosed since 1987 until the index date                                           | ICD-10: E10,E11<br>ICD-9: 25040-25073, 25090-25093                                                                                                   |
| Anaemia <sup>a)</sup>                         | Hospital discharge register | Diagnosed since 1987 until the index date                                           | ICD-10: D50-D53, D64<br>ICD-9: 2801-2819, 2859                                                                                                       |
| Fluid and electrolyte disorders <sup>a)</sup> | Hospital discharge register | Diagnosed since 1987 until the index date                                           | ICD-10: E86-E87<br>ICD-9: 760-276                                                                                                                    |
| Peripheral vascular disease <sup>a)</sup>     | Hospital discharge register | Diagnosed since 1987 until the index date                                           | ICD-10: I70, I712, I714, I716, I719, I73, I77, I79, K551, K559 , Z958<br>ICD-9: 4400-4409, 4412, 4414, 4417, 4419, 4431-4439, 4471, 5571, 5579, V434 |
| Psychosis <sup>a)</sup>                       | Hospital discharge register | Diagnosed since 1987 until the index date                                           | ICD-10: F2, F302, F312, F315, F323, F333, F39, F348<br>ICD-9: 29500-29899, 29910, 29911                                                              |
| Hypertension <sup>a)</sup>                    | Hospital discharge register | Diagnosed since 1987 until the index date                                           | ICD-10: I10, I11, I130, I150, I158<br>ICD-9: 4011, 4019, 40210, 40290, 40410, 40490, 40511, 40519, 40591, 40599                                      |
| Any mental hospitalization                    | Hospital discharge register | Any mental hospitalization during one year period preceding the index date          | Mental or behavioral disorders F*                                                                                                                    |
| Recent psychiatric hospitalization            | Hospital discharge register | Hospitalization during one year period preceding the AD diagnoses                   | Psychiatric hospitalization                                                                                                                          |
| Recent asthma/ COPD exacerbation              | Hospital discharge register | Hospitalization due to asthma/ COPD during one year period preceding the index date | J44-J46                                                                                                                                              |
| Recent antibiotic or                          | Prescription register       | Antibiotic or oral corticoid                                                        | Antiinfectives for systemic use J* and/or H02AB                                                                                                      |

Appendix to: Taipale H, Tolppanen A-M, Koponen M, et al. Risk of pneumonia associated with incident benzodiazepine use among community-dwelling adults with Alzheimer disease. *CMAJ* 2017. doi: 10.1503/cmaj.160126. Copyright © 2017 Joule Inc. or its licensors

|                                              |                       |                                                     |                                                                                                        |
|----------------------------------------------|-----------------------|-----------------------------------------------------|--------------------------------------------------------------------------------------------------------|
| oral corticoid use                           |                       | use during 30 days before the index date            |                                                                                                        |
| Recent theophylline use                      | Prescription register | Use during 180 days preceding the index date        | Theophylline R03DA04                                                                                   |
| Recent beta agonist use                      | Prescription register | Use during 180 days preceding the index date        | Selective beta-2-adrenoreceptor agonists R03AC                                                         |
| Recent inhaled anticholinergic use           | Prescription register | Use during 180 days preceding the index date        | Anticholinergics (inhaled) R03BB                                                                       |
| Recent inhaled corticoid use 180 days before | Prescription register | Use during 180 days preceding the index date        | Glucocorticoids (inhaled) R03BA                                                                        |
| Recent inhaled combination use               | Prescription register | Use during 180 days preceding the index date        | Adrenergics in combination with corticosteroids or other drugs, excl. anticholinergics (inhaled) R03AK |
| Antiepileptic use at the start of follow-up  | Prescription register | Use during a 2 week period preceding the index date | Antiepileptics N03A                                                                                    |
| Cardiovascular drug use at the baseline      | Prescription register | Use during a 2 week period preceding the index date | Cardiovascular drugs C*                                                                                |

<sup>a)</sup>According to Romano implementation of the Charlson index or Elixhauser system as described by Gagne and colleagues.<sup>1</sup>

## Reference

1. Gagne JJ, Glynn RJ, Avorn J, et al. A combined comorbidity score predicted mortality in elderly patients better than existing scores. *J Clin Epidemiol* 2011; 64: 749-759.
